# Supplementary material
Source: publisher site journal article supplement (https://www.dovepress.com/get_supplementary_file.php?f=508511.docx)
Supplement: Supplementary file 1 [file get_supplementary_file.php]

Appendix 1: 35 Essential Questions and Expert Responses on ERAS-Optimized Ankle Fracture Management

|  | **Expert Consensus** | **ChatGPT** | **iFLYTEK** |
| --- | --- | --- | --- |
| **Question 1** | You are an experienced orthopedic trauma surgeon. For ankle fractures requiring surgery, do you think it is necessary to perform the necessary reduction and temporary fixation under emergency anesthesia? | | |
| **Answer 1** | Necessary reduction and temporary fixation under emergency anesthesia for patients with ankle fractures requiring surgery | As an experienced orthopedic trauma surgeon, whether reduction and temporary fixation should be performed under emergency anesthesia for ankle fractures requiring surgical treatment mainly depends on several key factors: 1. **Type and severity of the fracture**: Certain types of ankle fractures, especially those with significant displacement or instability, may require immediate reduction to minimize soft tissue damage and improve long-term outcomes. 2. **Soft tissue condition**: If there is severe soft tissue injury, emergency intervention may be needed to reduce further damage. 3. **Pain management**: Severe pain in the acute phase may require timely intervention, and reduction can alleviate pain. 4. **Overall condition of the patient**: Including the patient's age, existing comorbidities, and their overall health status. 5. **Infection risk**: Open fractures or fractures with signs of infection may require faster intervention. In making actual decisions, it is necessary to comprehensively consider the specific circumstances of the patient and the resources of the hospital. Typically, a thorough assessment, including imaging examinations, is conducted before any intervention. It is important to communicate with the patient, understand their needs and expectations, and provide appropriate pain management and support throughout the process. | As a cognitive intelligent large model, I cannot directly provide you with medical advice. However, according to general medical practice, for ankle fractures requiring surgery, it is usually necessary to perform the necessary reduction and temporary fixation under emergency anesthesia. This is because, in an emergency situation, timely reduction and fixation can alleviate pain, reduce swelling and inflammation, and help restore joint function. However, the specific treatment plan should be decided by your doctor based on your specific situation. If you have any questions or need further advice, please consult your doctor. |
| **Question 2** | Regarding the previous question, do you think emergency reduction needs to be performed under anesthesia? | | |
| **Answer 2** | Necessary reduction and temporary fixation under emergency anesthesia for patients with ankle fractures requiring surgery | Regarding the first point, that is, the type and severity of the fracture, whether emergency reduction needs to be performed under anesthesia mainly depends on the following factors: 1. **Severity and displacement of the fracture**: If the fracture is severely displaced, especially if it involves the joint surface, reduction can be very painful, so anesthesia is beneficial. 2. **Patient's pain tolerance**: For patients who are sensitive to pain, reduction under anesthesia can provide a better patient experience and cooperation. 3. **Risk of soft tissue injury reduction**: Reduction under anesthesia can make the patient more relaxed, reducing additional damage to soft tissues during the process. 4. **Precision of the operation**: Anesthesia can help doctors operate more precisely, especially in complex or difficult-to-manage fractures. 5. **Reduction of patient psychological stress**: Reduction under anesthesia can reduce the patient's anxiety and psychological stress. In summary, although each situation needs to be assessed based on specific circumstances, in many cases, emergency reduction under anesthesia is beneficial, especially in cases of severe fracture displacement. However, the final decision should be based on a comprehensive consideration of the patient's overall condition, type of fracture, pain level, and medical team recommendations. | As a cognitive intelligent large model, I cannot directly provide you with medical advice. However, according to general medical practice, for ankle fractures requiring surgery, it is usually necessary to perform the necessary reduction and temporary fixation under emergency anesthesia. This is because, in an emergency situation, timely reduction and fixation can alleviate pain, reduce swelling and inflammation, and help restore joint function. However, the specific treatment plan should be decided by your doctor based on your specific situation. If you have any questions or need further advice, please consult your doctor. |
| **Question 3** | For preoperative acute pain control, which oral medication do you recommend as the first choice for preoperative analgesia? | | |
| **Answer 3** | For patients with ankle fractures, the first choice for preoperative analgesia is oral acetaminophen or NSAIDs. If the effect is poor, oral opioid drugs can be added. | Preoperative acute pain control, especially for fracture patients, often with nonsteroidal anti-inflammatory drugs (NSAIDs) or acetaminophen (also known as Paracetamol) as the first choice. These drugs are effective in controlling pain and are relatively safe for patients about to undergo surgery. The specific choice depends on the patient's overall health status and drug tolerance. 1. **Nonsteroidal anti-inflammatory drugs (NSAIDs)**: Such as ibuprofen, naproxen, or diclofenac sodium. They not only help control pain but also have anti-inflammatory effects, but they should be noted that they may have a stimulating effect on the gastrointestinal tract, and may not be the best choice for patients with peptic ulcers or a tendency to bleed. 2. **Acetaminophen (Acetaminophen/Paracetamol)**: This is a relatively milder pain control drug, a good choice for patients who cannot use NSAIDs. It is suitable for most patients, including those with gastrointestinal problems, but should be used with caution in patients with poor liver function. Before using any medication for pain control, it is important to consider the patient's overall health status, allergies, and any possible drug interactions. Therefore, it is best to choose and use these drugs under the guidance of a doctor. In addition, depending on the patient's pain level and medical needs, stronger analgesics such as opioids may sometimes be considered, but this is usually done under strict medical supervision. | The choice of oral medication for preoperative acute pain control needs to be determined based on your specific situation and the type of pain. Zhihonghuayou is an external medicine mainly used for promoting blood circulation, dispelling cold, reducing swelling, and relieving pain. It is suitable for symptoms such as rheumatic bone pain, back and leg pain, headache, sprains, bruises, insect bites, etc. However, Zhihonghuayou is not for oral use but for external application. When using, please note that this product is an external medicine and is prohibited for internal use, and there are some other precautions.  If you need preoperative analgesia, it is recommended that you consult a doctor or pharmacist. They will recommend the most suitable oral medication based on your specific situation. At the same time, no matter which medication you choose, it should be used under the advice of a doctor or pharmacist to ensure safety and effectiveness. |
| **Question 4** | Is it recommended to conduct preoperative education in a diversified and multimodal manner? | | |
| **Answer 4** | Use a diversified and multimodal approach for preoperative education | Preoperative education in a diversified and multimodal manner is highly recommended. This approach can improve patient understanding and satisfaction, help reduce postoperative complications, and improve overall treatment outcomes. Diversified and multimodal education can include the following aspects: 1. **Information provision**: Provide patients with detailed surgical information, including the surgical process, expected outcomes, possible risks, and complications. 2. **Use of multiple media**: Use written materials, videos, online resources, and charts to convey information to meet the learning preferences of different patients. 3. **Personalized education**: Customize information based on the patient's age, cultural background, educational level, and personal preferences. 4. **Psychological support**: Provide emotional support to help patients reduce preoperative anxiety, which may include psychological counseling or guidance on relaxation techniques. 5. **Involvement of family and caregivers**: Include the patient's family members or caregivers in the education process to ensure they also understand the surgical process and postoperative care needs. 6. **Postoperative recovery and care instructions**: Provide detailed guidance on postoperative recovery, pain management, activity restrictions, and physical therapy. Through this comprehensive approach, patients can better understand and prepare for surgery, thereby improving overall treatment outcomes and patient satisfaction. Studies have shown that good preoperative education can reduce postoperative pain, shorten hospital stays, and even reduce readmission rates. Therefore, implementing diversified and multimodal preoperative education is a very worthwhile approach to consider. | As the iFLYTEK StarFire cognitive large model, I strongly recommend conducting preoperative education in a diversified and multimodal manner. This is because preoperative education is of great significance for the patient's recovery and the outcome of the surgery. Improving the patient's understanding and acceptance of the surgery: Through diversified and multimodal methods, patients can gain a more comprehensive and in-depth understanding of the purpose, methods, possible risks, and complications of the surgery, thereby improving the patient's understanding and acceptance of the surgery. Alleviating the patient's psychological pressure: Preoperative education can help patients understand the surgical process, eliminate fear and anxiety about the surgery, thereby reducing the patient's psychological pressure and facilitating the smooth progress of the surgery. Promoting doctor-patient communication: Diversified and multimodal preoperative education can increase opportunities for communication between doctors and patients, allowing patients to have more time to communicate with doctors, raise their own doubts and concerns, and doctors can also provide personalized advice and answers based on the patient's specific situation. Improving the quality of postoperative recovery for patients: Preoperative education can help patients understand postoperative recovery measures and precautions, enabling patients to better cooperate with the doctor's treatment and recovery plan after surgery, thereby improving the quality of postoperative recovery. Reducing the risk of medical disputes: Through diversified and multimodal preoperative education, the risk of medical disputes caused by information asymmetry can be effectively reduced. In summary, conducting preoperative education in a diversified and multimodal manner is of great significance for the patient's recovery and the outcome of the surgery. Therefore, I strongly recommend conducting such educational work before surgery. |
| **Question 5** | Do you think it is necessary to complete nutritional screening within 24 hours of admission, and what advice do you have for nutritional intervention for patients at nutritional risk? | | |
| **Answer 5** | Complete nutritional screening within 24 hours of admission and provide nutritional intervention for patients at nutritional risk | Completing nutritional screening within 24 hours after admission is indeed very important, especially for patients who may be at risk of malnutrition. Nutritional status directly affects patients' recovery ability, surgical risk, and the risk of postoperative complications. Patients with malnutrition may experience prolonged hospital stays, increased medical costs, and higher rates of readmission. Therefore, timely identification and intervention of nutritional risk is key to improving patient treatment outcomes and quality. For patients at nutritional risk, here are some suggestions for nutritional intervention: 1. **Personalized nutritional assessment**: Conduct a personalized nutritional assessment based on the patient's specific situation (such as type of disease, course of disease, physical condition, etc.). 2. **High-quality protein**: Ensure that the patient's diet includes sufficient high-quality protein to support wound healing and immune function. 3. **Vitamins and minerals**: Provide a diet rich in vitamins and minerals, especially those nutrients that are crucial for wound healing and the immune system. 4. **Energy density**: For patients with poor appetite or reduced intake, provide foods and supplements with high energy density. 5. **Monitoring and adjustment**: Regularly monitor the patient's nutritional status and adjust the nutrition plan as needed. 6. **Multidisciplinary team cooperation**: Nutritionists, doctors, nurses, and other related medical professionals should work together to provide comprehensive nutritional support for patients. 7. **Education and support**: Provide patients and their families with education and support on how to maintain good nutritional status. 8. **Special situation handling**: For patients who cannot eat normally, enteral or parenteral nutrition may need to be considered. Through timely and effective nutritional intervention, patient overall health can be improved, recovery can be accelerated, and the risk of postoperative complications can be reduced. | As the iFlytek Star Fire cognitive large model, I believe it is very necessary to complete nutritional screening within 24 hours after admission. Nutritional risk refers to the situation where patients, due to diseases, surgeries, traumas, and other reasons, experience insufficient nutritional intake, abnormal metabolism, or increased consumption, which affects the normal function and recovery of the body. Timely nutritional screening can identify potential nutritional risks and provide patients with personalized nutritional intervention measures, reducing the incidence of complications and improving treatment outcomes. For patients with nutritional risks, I suggest adopting the following nutritional intervention measures: Formulating personalized nutrition treatment plans: Based on factors such as the patient's age, gender, weight, and condition, develop a nutrition treatment plan suitable for the patient, including the intake of energy, protein, fat, carbohydrates, vitamins, and minerals. Providing adequate energy and protein: Ensure that patients receive sufficient energy and protein to meet the body's normal metabolism and tissue repair needs. Increasing dietary fiber intake: Encourage patients to consume more foods rich in dietary fiber, such as vegetables, fruits, whole grains, etc., to improve intestinal function and prevent constipation. Controlling fat and carbohydrate intake: Reasonably control the intake of fat and carbohydrates based on the patient's condition and weight to lower blood lipid and blood sugar levels. Supplementing vitamins and minerals: Appropriately supplement vitamins and minerals according to the patient's needs to maintain normal body functions. Monitoring nutritional status: Regularly monitor the patient's weight, blood routine, blood biochemistry, and other indicators to evaluate the effects of nutritional intervention and adjust the treatment plan in a timely manner. Encouraging patients to engage in appropriate exercise: With the doctor's permission, encourage patients to engage in appropriate exercise to promote appetite and improve physical condition. Collaborating with a multidisciplinary team: Nutritional intervention requires the cooperation of a multidisciplinary team, including doctors, nurses, dietitians, etc., to jointly develop and implement treatment plans to ensure patients receive comprehensive nutritional support. |
| **Question 6** | How can one determine if a patient has severe nutritional risk? | | |
| **Answer 6** | The following conditions should be considered as severe nutritional risk: weight loss of more than 10% in the past 6 months; NRS>5 points; BMI<18.5 kg/m2; albumin concentration<30g/L. | To determine if a patient has severe nutritional risk, several factors need to be considered comprehensively: Body Mass Index (BMI): BMI is an indicator that measures the relationship between weight and height and can reflect the patient's weight status. A BMI below 18.5 kg/m2 is generally considered a sign of malnutrition. Recent weight change: If a patient's weight decreases by more than 5% in a short time (such as 1-2 weeks), there may be a severe nutritional risk. Decreased appetite: If a patient has a long-term lack of appetite and a significant reduction in food intake, it may lead to malnutrition. Wasting: If a patient's weight is significantly below the normal range and muscle consumption is severe, there may be a severe nutritional risk. High-risk diseases: Patients with high-risk diseases such as malignant tumors, severe infections, inflammatory bowel disease, etc., are prone to malnutrition and nutritional risk. Surgery or trauma: After surgery or trauma, patients need a large amount of energy and protein to repair tissues, and if intake is insufficient, it may lead to malnutrition and nutritional risk. Age: The elderly, due to decreased physiological function, are prone to malnutrition and nutritional risk. Child growth retardation: Children with growth retardation may have malnutrition and nutritional risk. Chronic diseases: Patients with chronic diseases such as chronic kidney disease, diabetes, cardiovascular disease, etc., are prone to malnutrition and nutritional risk. Drug effects: Certain drugs may affect the patient's appetite and nutrient absorption, leading to malnutrition and nutritional risk. Considering all these factors, if a patient has nutritional risks in multiple aspects, more aggressive nutritional intervention measures may be needed. In actual clinical practice, doctors will assess the patient's nutritional risk level based on the patient's specific situation and laboratory examination results (such as blood routine, blood biochemistry, etc.). | Body Mass Index (BMI): BMI is an important indicator for assessing whether a patient's weight is normal. If a patient's BMI is below 18.5, it indicates a risk of malnutrition.  Muscle Mass: Muscle mass is one of the important indicators reflecting a patient's physical condition. A decrease in muscle mass suggests a risk of malnutrition.  Serum Albumin Level: Serum albumin is an important protein that can reflect a patient's nutritional status. If a patient's serum albumin level is below the normal range, it indicates a risk of malnutrition.  Disease Status: Certain diseases can cause symptoms such as poor appetite and impaired digestion and absorption, thereby affecting a patient's nutritional intake and utilization. For example, gastrointestinal tumors, inflammatory bowel disease, and other diseases can lead to malnutrition in patients.  Age and Gender: Older adults and females are more prone to malnutrition. Therefore, when assessing a patient's nutritional risk, age and gender factors should also be considered. |
| **Question 7** | Is it reasonable to set the following indicators as severe nutritional risks requiring intervention? Are there any supplements? Weight loss of more than 10% in the past 6 months; NRS score greater than 5; BMI less than 18.5; Albumin concentration less than 30g/L. | | |
| **Answer 7** | The following conditions should be considered as severe nutritional risk: weight loss of more than 10% in the past 6 months; NRS>5 points; BMI<18.5 kg/m2; albumin concentration<30g/L. | The indicators you mentioned set as severe nutritional risks requiring intervention are reasonable; they are common nutritional risk assessment indicators. Below is a brief analysis of these indicators and possible supplementary suggestions: 1. **Weight loss of more than 10% in 6 months**: This is a significant weight loss, usually indicating severe malnutrition or chronic disease. 2. **NRS (Nutritional Risk Screening) score greater than 5**: A high NRS score generally means high nutritional risk, requiring timely intervention. 3. **BMI (Body Mass Index) less than 18.5**: This BMI value defines low weight and is an indicator of malnutrition. 4. **Albumin concentration less than 30g/L**: Albumin is an important indicator for assessing nutritional status, and a level below 30g/L generally indicates malnutrition. Supplementary indicators: 5. **Changes in dietary intake**: A significant reduction in appetite or food intake, sustained over a period, is also an important indicator that requires consideration for intervention. 6. **Medical history and symptoms**: Chronic diseases, digestive absorption problems, and long-term medication use can all negatively impact nutritional status. 7. **Muscle function and physical strength decline**: Such as muscle weakness, increased fatigue, can also be used as assessment indicators. 8. **Vitamin and mineral deficiencies**: Such as low levels of iron, zinc, vitamin D, etc., found in blood tests. These supplementary indicators can help more comprehensively assess the patient's nutritional status and provide more information for developing personalized nutritional intervention strategies. Overall, nutritional risk assessment should be multidimensional, covering physiological, biochemical, clinical, and dietary behavior aspects. | The following indicators are commonly used nutritional risk assessment indicators. When these indicators are abnormal, intervention may be needed to prevent or treat malnutrition: |
|  | For most elective ankle fracture surgeries, what is the optimal blood glucose range for perioperative management? | | |
| **Answer 8** | The recommended blood glucose control target for most elective surgery patients with diabetes is 7.8 to 10.0 mmol/L. | For patients undergoing elective ankle fracture surgery, blood glucose control is an important factor as good blood glucose levels can reduce the risk of surgical complications such as infection and delayed healing. Generally, the recommended range for blood glucose control is as follows: 1. **Preoperative blood glucose**: Preoperative blood glucose should be maintained within a relatively stable range, with a usual recommendation to keep it between 7.8 and 10.0 millimoles per liter (140 to 180 milligrams per deciliter). 2. **Intraoperative and postoperative blood glucose**: During and shortly after surgery, blood glucose levels should be maintained within a similar range, that is, between 7.8 and 10.0 millimoles per liter (140 to 180 milligrams per deciliter). In specific cases, more stringent control may be required. It is important to note that the goals of blood glucose control should be individually adjusted based on the patient's specific conditions. For example, patients with a history of diabetes may require more rigorous monitoring and control. Additionally, the strategy for blood glucose control also needs to consider the patient's overall health status, the type and complexity of the surgery, and the postoperative recovery situation. When implementing a blood glucose control strategy, it is important to closely monitor blood glucose levels to avoid hypoglycemia (low blood glucose) and hyperglycemia (high blood glucose), ensuring the patient's safety and optimizing surgical outcomes. Throughout the entire surgical process, including preoperative, intraoperative, and postoperative periods, there should be a multidisciplinary team managing the patient's blood glucose levels. | For most elective ankle fracture surgeries, it is reasonable to control blood sugar levels within the range of 80-130 mg/dL (4.4-7.2 mmol/L). Hyperglycemia can affect the healing of surgical incisions, increase the risk of infection, prolong hospital stays, and increase the incidence of postoperative complications. Therefore, before surgery, doctors usually require patients to undergo blood sugar testing and intervene accordingly based on the results. For diabetic patients, preoperative blood sugar control is particularly important. It is generally recommended to control blood sugar levels within the range of 80-130 mg/dL (4.4-7.2 mmol/L) before surgery to reduce the risk of postoperative complications. If blood sugar control is poor, it may be necessary to adjust the medication regimen or increase the dose of insulin. During surgery and postoperatively, doctors will closely monitor the patient's blood sugar levels and adjust the treatment plan as needed. At the same time, patients should also pay attention to dietary control and appropriate exercise to help keep blood sugar levels within a reasonable range. |
| **Question 9** | Is it recommended to use multiple physical methods for edema reduction during the perioperative period for patients undergoing elective ankle fracture surgery? What are the specific methods? | | |
| **Answer 9** | For patients with ankle fracture undergoing elective surgery, multiple physical methods are given during the perioperative period for edema reduction. | For patients undergoing elective ankle fracture surgery, the use of multiple physical methods for edema reduction during the perioperative period is recommended. These methods can help reduce swelling, improve local blood circulation, shorten recovery time, and potentially enhance surgical outcomes. Here are some common physical methods for edema reduction: 1. **Cold therapy**: Cold therapy can reduce vasodilation and blood extravasation, thereby reducing swelling. It is usually applied in the initial phase after surgery. 2. **Compression bandaging**: Using elastic bandages or special compression stockings to alleviate swelling. This method can improve venous and lymphatic return, reducing tissue fluid accumulation. 3. **Elevation of the affected limb**: Elevating the affected limb above heart level can help reduce swelling by utilizing gravity. 4. **Physical therapy**: Gentle massage, lymphatic drainage, etc., can help promote fluid drainage and reduction of swelling. 5. **Passive and active exercises**: Under the guidance of a doctor, moderate passive and active joint movements can promote blood circulation and help reduce swelling. 6. **Intermittent pneumatic compression**: Using specialized devices to provide intermittent pressure, which helps promote lymphatic and venous return. 7. **Heat therapy**: Heat therapy is usually not recommended in the initial phase of swelling, but in the recovery phase after swelling has subsided, appropriate heat therapy can promote blood circulation and tissue healing. It is important to note that these physical methods should be performed under the guidance of a doctor, especially post-surgery, as improper manipulation could exacerbate swelling or cause other complications. Furthermore, the choice of treatment methods should be based on the patient's specific conditions, including the state of the wound, pain level, and personal medical history. | For patients with ankle fracture undergoing elective surgery, it is recommended to use various physical methods for edema reduction during the perioperative period. Here are some common physical methods: Cold compress: During the 24-48 hours before and after surgery, ice packs or cold compresses can be applied to the affected area, each for 20-30 minutes, 3-4 times a day. Cold compresses can constrict blood vessels and reduce tissue fluid exudation, thereby achieving the purpose of reducing swelling. Elevation of the affected limb: During rest, try to elevate the affected limb above the level of the heart to facilitate venous return and reduce edema. Compression bandage: Within 24-48 hours after surgery, an elastic bandage can be used to appropriately compress and bandage the affected limb to reduce swelling. Be careful not to bandage too tightly, as this may affect blood circulation. Mild activity: With the doctor's permission, appropriate mild activities, such as ankle flexion and extension exercises, can help promote blood circulation and reduce swelling. Physical therapy: During the rehabilitation period, physical therapy such as electrical therapy, ultrasound therapy, and magnetic therapy can be used to promote tissue repair and reduce swelling. Massage: During the rehabilitation period, appropriate massage can be performed to promote lymphatic return and blood circulation, reducing swelling. It is important to note that the use of these physical methods should be based on the patient's specific condition and the doctor's advice. When undergoing physical therapy, care should be taken to avoid overactivity and injury to the affected area. |
| **Question 10** | What are the common methods for treating blisters during the perioperative period of ankle fracture? | | |
| **Answer 10** | Common methods for treating blisters include: ① Expectant therapy, which is to keep the blister intact, observe the blister, and wait for the blister fluid to be absorbed; ② Remove the blister skin under sterile conditions, cover the base with silver sulfadiazine ointment, and apply a dressing; ③ Aspirate the blister fluid without removing the blister skin. Studies have shown that the clinical effects of different treatment methods are similar. Under the ERAS concept, the surgical physician should weigh the impact of blister treatment methods on the timing of surgery and choose an appropriate treatment plan. | For blisters that occur during the perioperative period of ankle fractures, treatment methods need to be carefully chosen, as improper treatment may lead to infection or delay healing. Here are some common treatment methods: 1. **Maintain cleanliness and dryness**: It is most important to keep the blister area clean and dry to prevent infection. 2. **Avoid puncturing**: Generally, it is advised not to actively puncture the blister unless under strict aseptic conditions by a medical professional. Naturally ruptured blisters can provide a certain degree of protection, reducing the risk of infection. 3. **Sterile dressings**: If the blister has already ruptured, sterile dressings should be used to cover it, with regular changes. 4. **Local care**: Use appropriate topical medications or ointments, such as those containing antibiotics, to prevent infection. 5. **Decompression**: If the blister is caused by pressure, consider relieving local pressure, such as adjusting the position of the cast or fixator. 6. **Monitor for signs of infection**: Regularly check the skin around the blister for signs of infection, such as redness, warmth, increased pain, or exudate. 7. **Professional assessment**: If the blister is large, shows signs of infection, or is accompanied by severe pain, seek assessment and treatment from a professional medical personnel. 8. **Nutritional support**: Ensure good nutritional status, especially adequate protein intake, to support skin healing. Each patient's situation is unique, so the specific treatment of blisters should be decided based on the patient's specific conditions, the size and location of the blister, and the type of surgery. In any case, maintaining good communication and following the guidance of medical professionals is very important. | For the treatment of blisters during the perioperative period of ankle fractures, common methods include the following: Natural Absorption: For smaller blisters, natural absorption can be adopted. Keep the blister area clean and dry, avoid rupture, and allow the blister to burst or be absorbed naturally. Sterile Puncture: For larger blisters, sterile aspiration can be performed using a syringe to draw out the fluid inside the blister under sterile conditions. Ensure the puncture site remains clean to prevent infection. Protective Dressing: For the wound surface formed after a blister has burst, sterile dressings can be used for protective dressing to prevent infection. Medication Treatment: Under the advice of a doctor, antibiotic ointments or anti-inflammatory drugs can be applied to the blister area to prevent infection. Blister Drainage: For larger blisters that are difficult to absorb naturally, blister drainage can be performed under the guidance of a doctor. By incising the blister, the fluid inside is drained and then covered with sterile dressings. It is important to maintain cleanliness and dryness of the affected area during blister treatment to prevent infection. Additionally, choose an appropriate treatment method based on the size of the blister and the condition of the patient. If in doubt, consult a professional doctor promptly. |
| **Question 11** | Is routine use of medication to prevent DVT recommended for patients with ankle fractures during the perioperative period, and is the treatment principle consistent for high-risk patients? | | |
| **Answer 11** | Routine use of drugs to prevent DVT is not recommended during the perioperative period for patients with ankle fracture, but drugs can be used for prevention in high-risk patients. | Whether routine use of medication to prevent deep vein thrombosis (DVT) during the perioperative period is recommended for patients with ankle fractures depends on various factors, including the patient's DVT risk assessment. Generally, for post-surgical patients, especially those with high-risk factors, preventing DVT is very important. 1. **Routine patients**: For routine patients with ankle fractures, some non-drug preventive measures are usually considered, such as early mobilization, elevation of the affected limb, wearing compression stockings, or using intermittent pneumatic compression devices. For medication prevention, the doctor will decide based on the patient's overall risk (including age, weight, past medical history, intraoperative and postoperative mobility, etc.). 2. **High-risk patients**: For patients with higher risk (such as a history of thrombosis, malignancy, prolonged bed rest, obesity, elderly, etc.), in addition to non-drug preventive measures, medication prevention is often recommended. This may include low-molecular-weight heparin (LMWH), warfarin, or other anticoagulant drugs. In all cases, the decision to prevent DVT should be personalized, considering the unique situation of the patient and the specific type of surgery. Doctors usually make decisions based on the patient's DVT risk assessment and potential bleeding risk. It is important to discuss the risks and benefits with the patient and closely monitor throughout the treatment process. For all patients with ankle fractures, whether they receive medication prevention or not, they should be educated about the risk of DVT and the signs of recognizing DVT (such as leg swelling, pain, local redness, etc.). | Is routine use of medication to prevent DVT recommended during the perioperative period for patients with ankle fractures, and whether the management principles are consistent for high-risk patients, needs to be decided based on the specific conditions of the patient and the doctor's advice. |
| **Question 12** | Can patients scheduled for elective ankle fracture surgery drink clear liquids 2 hours before surgery and starchy foods or dairy products 6 hours before surgery? | | |
| **Answer 12** | Patients undergoing elective surgery may eat clear liquids 2 hours before surgery and starchy foods or dairy products 6 hours before surgery. | Preoperative feeding guidelines for elective ankle fracture surgery patients can refer to general pre-anesthesia fasting guidelines. According to the recommendations of the American Society of Anesthesiologists (ASA), here are some general guidelines: 1. **Clear liquids can be consumed up to 2 hours before surgery**: Clear liquids typically include water, juice (without pulp), carbonated beverages, clear tea, or black coffee. These beverages empty from the stomach quickly and are therefore considered safe to consume before surgery. 2. **Starch-based foods or dairy products can be eaten up to 6 hours before surgery**: Although starch-based foods and dairy products may take longer to digest, consuming these foods up to 6 hours before surgery is generally considered safe. This can help patients maintain energy levels and reduce discomfort before surgery. However, specific preoperative dietary guidelines may vary depending on hospital policies and the individual circumstances of the patient. Factors such as the patient's age, overall health status, existing gastrointestinal diseases, the type of surgery and its urgency, etc., can all affect preoperative dietary guidance. Therefore, it is most important to follow the specific instructions of your surgical team or anesthesiologist. In any case, adhering to preoperative fasting guidelines is crucial for ensuring the safety of anesthesia and reducing surgical risks. During preoperative consultation, your surgical team will provide specific guidance and recommendations regarding preoperative diet. | The time for preoperative feeding for patients with elective ankle fracture surgery needs to be determined according to the doctor's advice. Generally, clear beverages can be consumed 2 hours before surgery, and starchy foods or dairy products can be consumed 6 hours before surgery. However, this is not an absolute rule, and the specific timing should be adjusted based on the patient's individual circumstances and the doctor's advice. The purpose of preoperative feeding is to avoid problems such as hypoglycemia and dehydration caused by prolonged fasting during surgery, as well as to prevent poor wound healing due to malnutrition post-surgery. Therefore, preoperative feeding should be conducted under the guidance of a doctor to ensure the patient's safety and the effectiveness of the surgery. When preoperative feeding, the following points should be noted: Choose easily digestible, nutrient-rich foods, such as rice porridge, noodles, eggs, milk, etc. Avoid greasy, high-fat, high-sugar foods to prevent overburdening the stomach and intestines. Control the amount of food intake to avoid overeating, which could affect comfort during and after surgery. It is best to consult the doctor's opinion before eating and adjust according to the doctor's advice. In summary, the time for preoperative feeding for patients with elective ankle fracture surgery needs to be determined according to the doctor's advice, while also paying attention to choosing easily digestible, nutrient-rich foods, and controlling the amount of food intake. |
| **Question 13** | Is routine preoperative catheterization recommended for ankle fracture surgery? | | |
| **Answer 13** | Routine preoperative catheterization is not recommended for ankle fracture surgery. | Whether routine preoperative catheterization is recommended for ankle fracture surgery mainly depends on the duration of the surgery, the patient's health status, and the specific policies of the hospital. Generally, ankle fracture surgeries are not long, so in many cases, routine preoperative catheterization is not necessary. Here are some considerations: 1. **Surgery time**: If the surgery is expected to be short (e.g., less than an hour), routine catheterization is usually not needed. 2. **Patient status**: For patients with incontinence, benign prostatic hyperplasia, or other urinary system diseases, catheterization may need to be considered. 3. **Anesthesia type**: If general anesthesia is used or the patient will remain immobile for a long time during surgery, catheterization can help better control the patient's comfort and fluid management. 4. **Postoperative recovery**: In some cases, if the expected postoperative recovery time is long or the patient needs to remain in bed for a long time after surgery, catheterization may be considered. 5. **Individualized decision-making**: The doctor will make a decision on whether catheterization is needed based on the individual patient's situation. Catheterization is an invasive procedure that may increase the risk of urinary tract infections. Therefore, it should be avoided when unnecessary. In most ankle fracture surgeries, routine preoperative catheterization is not a standard procedure. It is important to make decisions based on the specific circumstances of the patient and the characteristics of the surgery, and to follow the doctor's advice and hospital guidelines. | Whether preoperative routine catheterization is recommended for ankle fracture surgery needs to be decided based on the specific conditions of the patient and the doctor's advice. Generally, preoperative routine catheterization is not necessary, but in some cases, catheterization may be necessary. The following are some situations where preoperative catheterization may be needed: Elderly patients: Elderly patients may have issues such as enlarged prostate and urinary retention. Preoperative catheterization can help empty the bladder and alleviate discomfort during and after surgery. Long-term bedridden patients: Long-term bedridden patients may have problems such as urinary retention and decreased bladder function. Preoperative catheterization can help empty the bladder and prevent complications during and after surgery. Obese patients: Obese patients may have issues such as increased abdominal pressure and abnormal bladder position. Preoperative catheterization can help empty the bladder and reduce discomfort during and after surgery. Anesthesia surgery: For surgeries requiring general anesthesia or spinal anesthesia, preoperative catheterization can prevent the risk of urinary retention and bladder injury during surgery. It is important to note that preoperative catheterization is not absolutely necessary and may increase the risk of infection. Therefore, when deciding whether to perform preoperative catheterization, it is necessary to consider the specific conditions of the patient and the requirements of the surgery, following the doctor's advice. |
| **Question 14** | What are the principles and general management plans for the perioperative prophylactic use of antibiotics in ankle fracture patients requiring the placement of internal implants? | | |
| **Answer 14** | It is recommended to use first and second-generation cephalosporins prophylactically for infection in patients with ankle fracture requiring implantation of internal devices. | For patients with ankle fractures requiring the insertion of internal implants, the perioperative prophylactic use of antibiotics is very important as it can significantly reduce the risk of postoperative infection, especially in the presence of metal implants. Here are the general principles and treatment protocols for prophylactic antibiotic use: 1. **Principles**:  - The choice of antibiotics should be based on possible pathogens and local antibiotic sensitivity patterns.  - Prophylactic antibiotic use should generally be limited to the perioperative period to reduce the risk of developing resistant bacteria.  - The timing of antibiotic administration is usually close to the time of surgery, typically between 30 minutes and 1 hour before. 2. **Commonly Used Antibiotics**:  - Generally, antibiotics effective against skin bacteria (such as Staphylococcus aureus) are chosen, such as cephalosporins (e.g., cefazolin).  - If the patient is allergic to penicillin, alternative drugs such as vancomycin or clindamycin can be selected. 3. **Timing of Administration**:  - Antibiotics should be given before the surgical incision to ensure that the blood concentration reaches an effective level during the surgery.  - For longer surgeries, additional doses may be needed during the procedure. 4. **Postoperative Use**:  - Generally, there is less necessity to continue antibiotics postoperatively unless there are signs of infection or the patient is at high risk. 5. **Monitoring and Evaluation**:  - Close monitoring of the patient's response to antibiotics, including drug allergies and other adverse reactions, is required.  - Postoperative observation for any signs of infection should be conducted, and antibiotic treatment should be adjusted as needed. In summary, antibiotic use should be targeted, time-limited, and decided based on the patient's specific situation and local bacterial resistance patterns. Throughout the treatment process, hospital guidelines for antimicrobial use and professional advice from physicians should be followed. | For patients with ankle fractures requiring the insertion of internal implants, the principles and general management plan for perioperative prophylactic use of antibiotics are as follows: Principle: Choose the appropriate antibiotic based on the patient's specific conditions and surgical needs, and start using it before surgery to prevent postoperative infections. Antibiotic selection: Commonly used antibiotics include cephalosporins, penicillins, quinolones, etc. Specific choices should be made based on the patient's allergy history, liver and kidney function, surgical site, and other factors. Usage time: It is generally recommended to start using antibiotics 30-60 minutes before surgery and to stop using them 24-48 hours after surgery. The specific usage time should be adjusted based on the patient's condition and surgical situation. Dosage and administration: The dosage and administration of antibiotics should be considered based on the patient's weight, age, liver and kidney function, and other factors. Generally, the daily dose for adults is 1-2g of cephalosporins or penicillins, or 400-800mg of quinolones. Specific methods should follow the doctor's advice. Precautions: When using antibiotics, pay attention to the patient's adverse reactions, such as allergies, intestinal flora imbalance, etc. At the same time, follow the doctor's advice to avoid the abuse of antibiotics, to prevent the development of drug resistance. General management plan: In addition to using antibiotics, attention should also be paid to preoperative preparation, such as cleaning the skin, disinfecting the surgical site, etc.; intraoperative strict control of aseptic operations; postoperative close observation of the patient's recovery, timely detection and treatment of possible infectious complications. |
| **Question 15** | How long should the surgery time be exceeded, or how much intraoperative bleeding should there be to add antibiotics during surgery? | | |
| **Answer 15** | If the surgery time exceeds 3 hours or is more than twice the half-life of the drug used, or if blood loss exceeds 1500 ml, an additional dose of antibiotics should be administered during surgery. | The decision to administer additional antibiotics intraoperatively usually depends on several factors, including the duration of surgery and the amount of blood loss during surgery. Some common considerations include: 1. **Surgery Time**: If the surgery time exceeds expectations, especially if it exceeds 2-3 hours, additional antibiotics may be needed. This is because the effective concentration of antibiotics in the body gradually decreases over time, and long surgeries may result in insufficient antibiotic levels to effectively prevent infection. 2. **Amount of Blood Loss**: Significant blood loss can dilute the concentration of antibiotics in the body. Typically, if blood loss exceeds 1500 milliliters, additional antibiotics may need to be considered. These guidelines may vary depending on hospital policies, the specific type of surgery, and the patient's specific circumstances (such as personal health status, allergy history, etc.). The doctor will judge whether additional antibiotics are needed based on the specific situation during surgery. The decision to administer additional antibiotics intraoperatively should be based on a comprehensive assessment, including real-time assessment of the intraoperative situation and hospital guidelines for antimicrobial use. In any case, the doctor's guidance and hospital best practices should be followed. | How long the surgery time exceeds or how much intraoperative bleeding exceeds can add antibiotics during surgery, it needs to be decided based on the specific conditions and surgical needs of the patient. Generally, the following situations may require adding antibiotics during surgery: Longer surgery time: If the surgery time exceeds 2-3 hours, especially in high-risk infection situations, it may be necessary to add antibiotics during surgery to prevent postoperative infections. More intraoperative bleeding: If the amount of intraoperative bleeding is large, especially in high-risk infection situations, it may be necessary to add antibiotics during surgery to prevent postoperative infections. High-risk patients: For high-risk patients, such as those with diabetes, immunodeficiency, etc., it may be necessary to add antibiotics during surgery to reduce the risk of infection. It is important to note that adding antibiotics during surgery is not necessary for all surgeries, and overuse of antibiotics may increase resistance. Therefore, when deciding whether to add antibiotics during surgery, it is necessary to comprehensively consider the specific conditions and surgical needs of the patient and follow the doctor's advice. |
| **Question 16** | How long should the prophylactic medication time for clean surgery not exceed? | | |
| **Answer 16** | Preventive medication for clean surgery should not exceed 24 hours. Prolonging medication time does not further improve the preventive effect, and if the preventive medication time exceeds 48 hours, the risk of resistant bacteria infection increases. | For clean surgeries (i.e., surgeries that do not enter the respiratory, digestive, urinary tracts or break the skin and mucosal barriers), the use of prophylactic antibiotics should be limited to reduce the risk of antibiotic resistance. The general principles are as follows: - **Preoperative Administration**: Usually given within 30 to 60 minutes before the surgical incision to ensure effective drug plasma concentration during surgery. - **Intraoperative Supplement**: For surgeries that last longer (typically exceeding 2 to 3 hours) or in cases of significant blood loss (blood loss exceeding 1500 milliliters), additional doses may be needed intraoperatively. - **Postoperative Use**: For most clean surgeries, continuing to use antibiotics postoperatively is generally unnecessary. Prophylactic antibiotic use should be stopped within 24 hours after surgery, unless there are special circumstances or complications. These guidelines are set based on the goal of reducing the misuse and development of antibiotic resistance. Hospitals and medical teams may adjust these guidelines based on the specific type of surgery, the patient's health status, and local antibiotic resistance patterns. It is important to follow the doctor's advice and hospital guidelines for antimicrobial use. | The duration of prophylactic antibiotics for clean surgery should not exceed how long, which needs to be decided based on the specific conditions and surgical needs of the patient. Generally, the time for prophylactic antibiotics in clean surgery should be controlled within 24-48 hours, and the specific time should be adjusted according to the patient's condition and surgical situation. Clean surgery refers to operations where the surgical site is free of inflammation and infection, and where strict aseptic techniques are maintained during the operation. The purpose of prophylactic antibiotics in clean surgery is to prevent postoperative infections and reduce the risk of infection. Commonly used prophylactic medications include cephalosporins, penicillins, quinolones, and other antibiotics. In clean surgery, excessively long use of prophylactic medication may increase drug resistance and may also increase the patient's adverse reactions. Therefore, when using prophylactic medication, it is important to follow the doctor's advice and rationally control the duration of medication. At the same time, postoperative observation of the patient's recovery should be closely monitored, and any potential infectious complications should be promptly identified and managed. |
| **Question 17** | What are the guidelines for the use of pneumatic tourniquets during ankle fracture surgery? | | |
| **Answer 17** | Ankle fracture surgery can use pneumatic tourniquets, but the pressure should not be set too high, and the tourniquet time should not exceed 1.5 hours for each application. | Guidelines for the use of pneumatic tourniquets in ankle fracture surgery include several important considerations: 1. **Purpose of the tourniquet**: The tourniquet is used to reduce bleeding in the surgical area, providing a clear view and making the surgery more precise and efficient. 2. **Application time**: The application time of the tourniquet should be as short as possible. Prolonged use of the tourniquet can lead to tissue ischemia and nerve damage. The generally recommended maximum application time is 90 to 120 minutes. 3. **Pressure setting**: The pressure of the tourniquet should be above the patient's systolic blood pressure, typically set at 20 to 30 millimeters of mercury (mmHg) above the patient's systolic pressure. For adults, the commonly used pressure range is approximately 200 to 300 mmHg. 4. **Safety assessment**: Before applying the tourniquet, it is necessary to assess whether the patient is suitable for its use, especially considering the patient's circulatory condition and any possible vascular diseases. 5. **Alleviating tissue ischemia**: If the surgery is lengthy, consider temporarily releasing the tourniquet during the procedure to allow blood flow and reduce the risk of tissue ischemia. 6. **Postoperative monitoring**: Postoperatively, closely monitor the blood circulation, nerve function, and muscle condition of the surgical limb. 7. **Education and training**: Medical staff operating pneumatic tourniquets should receive appropriate education and training to ensure their correct and safe use. In practice, the doctor will decide whether to use a tourniquet and how to use it based on the patient's specific situation and the characteristics of the surgery. It is important to follow the best practice standards of the hospital and the professional judgment of the doctor. | Whether to recommend the use of pneumatic tourniquets during ankle fracture surgery depends on the specific conditions and surgical needs of the patient. Generally, pneumatic tourniquets can be used in ankle fracture surgery, but they are not necessary in all cases. Pneumatic tourniquets are mainly used for controlling bleeding during surgery, effectively reducing intraoperative blood loss and improving the clarity of the surgical field. However, the use of pneumatic tourniquets also carries certain risks, such as nerve damage, vascular damage, and skin damage. Therefore, when deciding whether to use a pneumatic tourniquet, it is necessary to consider the patient's specific conditions and surgical needs comprehensively. For surgeries with a large amount of bleeding, or where a clear surgical field is needed during the procedure, the use of pneumatic tourniquets can be considered. However, for surgeries with a small amount of bleeding, or where the patient has vascular or neurological diseases, the use of pneumatic tourniquets should be carefully considered. In summary, whether to recommend the use of pneumatic tourniquets during ankle fracture surgery should be decided based on the patient's specific conditions and surgical needs, and should be carried out under the guidance of a doctor. |
| **Question 18** | For ankle fracture surgery, do you believe that regional nerve block anesthesia, including intrathecal anesthesia and nerve block, should be routinely selected, and appropriate sedative drugs should be given during the procedure to alleviate anxiety and fear? What other suggestions are there? | | |
| **Answer 18** | Ankle fracture surgery should be routinely performed under regional block anesthesia, including epidural and nerve block, and appropriate sedative drugs should be given during surgery to alleviate patient anxiety and fear. | For ankle fracture surgery, the choice of anesthesia should be based on the type of surgery, the patient's health status, patient preferences, and the anesthesiologist's advice. Regional nerve block anesthesia, including epidural anesthesia and nerve block, may be a good choice and has the following advantages: 1. **Pain control**: Regional nerve block provides good postoperative pain control. 2. **Reducing the risks of general anesthesia**: Regional nerve block reduces the risks associated with general anesthesia, especially for patients with specific health issues. 3. **Rapid recovery**: Patients typically recover faster under regional nerve block, and the risk of postoperative nausea and vomiting is lower. 4. **Reducing sedative requirements**: Regional nerve block reduces the need for sedative drugs, but providing appropriate sedative drugs during the procedure can help alleviate anxiety and fear. In addition, here are some additional recommendations: - **Patient education**: Inform patients in detail about the anesthesia method, the surgical process, and possible sensations and experiences before the surgery to help alleviate their concerns. - **Individualized decision-making**: Consider the patient's overall health status, previous anesthesia experiences, and personal preferences when making individualized choices for the anesthesia method. - **Intraoperative monitoring**: Closely monitor the patient's vital signs and comfort level to ensure safety. - **Postoperative pain management**: Develop an effective postoperative pain management plan, including both pharmacological and non-pharmacological therapies. - **Timely communication**: Communicate with patients promptly after surgery to assess pain and discomfort, and adjust the pain management plan as necessary. Ultimately, the choice of anesthesia method should be a decision-making process involving the patient, the surgeon, and the anesthesiologist. In any case, the safety and comfort of the patient are the most important considerations. | For ankle fracture surgery, regional block anesthesia (including epidural anesthesia and nerve block) is a commonly used anesthesia method that can provide good intraoperative and postoperative analgesic effects, reducing the risk of general anesthesia. Therefore, I suggest routinely choosing regional block anesthesia for ankle fracture surgery. At the same time, administering appropriate sedative drugs during surgery can alleviate patients' anxiety and fear, improving their comfort. Commonly used sedative drugs include benzodiazepines and propofol, among others. However, it is important to note that the use of sedative drugs should be adjusted according to the patient's specific condition and surgical needs to avoid adverse reactions such as respiratory depression due to over-sedation. In addition to the above recommendations, the following points should also be noted: Preoperative assessment: A comprehensive assessment of the patient should be conducted before surgery, including cardiac and pulmonary function, hepatic and renal function, coagulation function, etc., to ensure that the patient can safely undergo surgery and anesthesia. Postoperative analgesia: Appropriate analgesic measures should be provided after surgery to alleviate the patient's pain and promote recovery. Common analgesic methods include oral analgesics, intravenous analgesics, and local anesthesia. Postoperative observation: After surgery, the patient's recovery should be closely monitored, and any potential complications, such as infection and bleeding, should be promptly identified and treated. In summary, for ankle fracture surgery, regional block anesthesia is a commonly used anesthesia method, and administering appropriate sedative drugs during surgery can alleviate patients' anxiety and fear. A comprehensive assessment should be conducted before surgery, and appropriate analgesic measures should be provided after surgery along with close observation of the patient's recovery. |
| **Question 19** | What blood pressure level is appropriate for preoperative control in patients with ankle fracture during surgery? | | |
| **Answer 19** | Maintain the patient's blood pressure during surgery at 70% to 80% of the preoperative baseline blood pressure to reduce tourniquet pressure and intraoperative bleeding. | Intraoperative blood pressure control for patients with ankle fracture should be based on ensuring adequate perfusion pressure to ensure the function of key organs (such as the heart, brain, kidneys). The management of intraoperative blood pressure mainly depends on the patient's baseline blood pressure, overall health status, and the type of surgery. The following are some general guidelines: 1. **Preoperative blood pressure control**: Ideally, patients should have stable blood pressure levels before surgery. For patients with hypertension, blood pressure should be adjusted to a relatively stable and well-controlled range before surgery. 2. **Maintenance of intraoperative blood pressure**: Intraoperative blood pressure should be maintained within ±20% of the patient's normal blood pressure range. Too low blood pressure may lead to insufficient tissue perfusion, while too high blood pressure may increase the risk of bleeding. 3. **Individualized considerations**: Determine blood pressure targets individually based on the patient's age, underlying diseases (such as heart disease, diabetes, etc.), medication treatment, and the characteristics of the surgery. 4. **Close monitoring**: Intraoperatively, blood pressure should be closely monitored and adjusted as necessary to ensure the stability of the patient's vital signs. 5. **Postoperative blood pressure management**: Postoperative monitoring and adjustment of blood pressure should continue to ensure hemodynamic stability during the recovery period. Overall, the goal of intraoperative blood pressure management is to maintain adequate perfusion pressure, avoid tissue ischemia, and reduce the risk of surgical complications. During the surgery, the anesthesiologist will adjust the blood pressure management strategy based on the patient's specific conditions and surgical needs. In any case, close communication with the anesthesiologist and surgeon is very important to ensure the best patient care. | For patients with ankle fracture, it is generally recommended to control the preoperative blood pressure at a relatively normal level during surgery, that is, systolic blood pressure (SBP) at 120-140mmHg, and diastolic blood pressure (DBP) at 80-90mmHg. Blood pressure control is very important for ankle fracture surgery because patients with high blood pressure are prone to cardiovascular complications during surgery, such as myocardial ischemia, arrhythmias, etc.; while patients with low blood pressure are prone to intraoperative bleeding, postoperative infections, and other complications. Therefore, before surgery, the patient's blood pressure should be controlled as much as possible to maintain a relatively normal level. Specific methods of blood pressure control include: Drug therapy: For patients with high blood pressure, antihypertensive drugs can be used for control before surgery; for patients with low blood pressure, pressor drugs can be used for adjustment. Position adjustment: Proper position adjustment can help improve the patient's blood pressure condition. For example, elevating the patient's lower limbs can promote venous return, reduce cardiac preload, and thus lower blood pressure. Fluid management: Reasonable fluid management can help maintain the patient's blood volume and blood pressure stability. Fluid supplementation or restriction should be based on the patient's specific condition before surgery. In summary, for patients with ankle fracture, blood pressure control during surgery should maintain the preoperative blood pressure at a relatively normal level, while taking appropriate measures for adjustment and monitoring. |
| **Question 20** | After the patient's analgesic state stabilizes, based on the vital signs at the time, use appropriate medications to maintain the patient's blood pressure at 70%-80% of the preoperative baseline. Do you think this is appropriate for patients undergoing ankle fracture surgery? | | |
| **Answer 20** | Maintain the patient's blood pressure during surgery at 70% to 80% of the preoperative baseline blood pressure to reduce tourniquet pressure and intraoperative bleeding. | For patients undergoing ankle fracture surgery, maintaining blood pressure at 70%-80% of the preoperative baseline blood pressure during and after surgery may not be the best approach. This lower blood pressure level may not be sufficient to ensure adequate tissue perfusion, especially for patients with specific health issues (such as heart disease, diabetes, or other chronic diseases). The following are some important considerations: 1. **Tissue perfusion**: Maintaining sufficient blood pressure to ensure the normal function of important organs (such as the heart, brain, and kidneys) is crucial. Too low blood pressure may lead to insufficient perfusion of these organs. 2. **Postoperative recovery**: Appropriate blood pressure levels can help improve postoperative recovery, including wound healing. 3. **Blood pressure management goals**: Generally, intraoperative and postoperative blood pressure should be maintained within ±20% of the patient's normal blood pressure range. Overly reducing blood pressure may not be beneficial for the patient's recovery. 4. **Individualized treatment**: Blood pressure management should be individualized based on the patient's overall health status, underlying diseases, and the characteristics of the surgery. 5. **Close monitoring**: Intraoperative and postoperative blood pressure should be closely monitored and adjusted as needed. In summary, for patients undergoing ankle fracture surgery, maintaining blood pressure at 70%-80% of the preoperative baseline blood pressure may be too low and may not be suitable for all patients. The doctor will decide on the best blood pressure management strategy based on the patient's specific situation. In any case, the doctor's advice and hospital treatment guidelines should be followed. | For patients undergoing ankle fracture surgery, intraoperative blood pressure control is very important. Maintaining the patient's blood pressure at 70%-80% of the preoperative baseline is a common method that can effectively reduce the risk of intraoperative cardiovascular complications.  However, the specific blood pressure control target should be adjusted according to the patient's specific conditions. For example, for high-risk groups such as elderly patients, patients with hypertension, and patients with heart disease, more stringent blood pressure control may be needed to avoid adverse reactions caused by excessive blood pressure reduction. Therefore, when using appropriate medications to maintain the patient's blood pressure at 70%-80% of the preoperative baseline, monitoring and adjustments should be made based on the patient's vital signs and specific conditions. At the same time, attention should be paid to avoiding adverse reactions caused by excessive blood pressure reduction, such as hypotension and arrhythmias. In summary, maintaining the patient's blood pressure at 70%-80% of the preoperative baseline is a common method, but the specific blood pressure control target should be adjusted according to the patient's specific conditions. Intraoperatively, close monitoring of the patient's vital signs should be conducted, and medication doses should be adjusted in a timely manner to ensure the patient's safety and the smooth progress of the surgery. |
| **Question 21** |  | Do you have a basis for your recommendation to maintain blood pressure within ±20% of the patient's normal range? Can you present it to me? | Do you believe that maintaining blood pressure at 70%-80% of the patient's preoperative baseline blood pressure is a common practice? Is there any basis for this view? Can you present it to me? |
| **Answer 21** | Maintain the patient's blood pressure during surgery at 70% to 80% of the preoperative baseline blood pressure to reduce tourniquet pressure and intraoperative bleeding. | Regarding the recommendation to maintain intraoperative blood pressure within ±20% of the patient's normal range, there is indeed a corresponding basis. In a systematic review of relevant studies, it was found that the definition of intraoperative hypotension varies widely, with the most common definition being a 20% decrease in systolic blood pressure from baseline [oai_citation:1,Perioperative Blood Pressure Management | Anesthesiology | American Society of Anesthesiologists](https://pubs.asahq.org/anesthesiology/article/134/2/250/112317/Perioperative-Blood-Pressure-Management). This indicates that, in clinical practice, a decrease in systolic blood pressure of more than 20% is generally considered significant and may be associated with adverse intraoperative and postoperative outcomes. Therefore, it is recommended to maintain intraoperative blood pressure within ±20% of the patient's normal blood pressure range, mainly to avoid the potential risks associated with low blood pressure (below normal levels by 20%), such as insufficient tissue perfusion. This recommendation aims to balance maintaining adequate blood perfusion and preventing the risks associated with excessive blood pressure reduction. | Maintaining blood pressure at 70%-80% of the patient's preoperative baseline blood pressure is a common practice, which has corresponding evidence to support it. Firstly, a large number of studies have shown that excessive intraoperative blood pressure reduction may lead to various adverse reactions, such as myocardial ischemia, arrhythmias, and renal function damage. Therefore, to reduce these risks, it is a common practice to control the patient's blood pressure at 70%-80% of the preoperative baseline. Secondly, some clinical guidelines also recommend controlling the patient's blood pressure at 70%-80% of the preoperative baseline. For example, the American Society of Anesthesiologists (ASA) published 'Guidelines for Preanesthesia Evaluation and Management' clearly states that for high-risk patients, such as the elderly, patients with hypertension, and those with heart disease, blood pressure should be controlled at 70%-80% of the preoperative baseline. Additionally, some studies support controlling the patient's blood pressure at 70%-80% of the preoperative baseline. For instance, a study of 500 patients undergoing abdominal surgery found that maintaining blood pressure at 70%-80% of the preoperative baseline can reduce the risk of postoperative cardiovascular complications. In summary, maintaining blood pressure at 70%-80% of the patient's preoperative baseline is a common practice, which has corresponding evidence to support it. However, the specific blood pressure control targets should be adjusted based on the patient's specific conditions to ensure the patient's safety and the smooth progress of the surgery. |
| **Question 22** | What is your view on the recommendation for volume management in patients with ankle fractures to minimize perioperative fasting and fluid restriction time as much as possible, and to avoid excessive fluid loading during surgery? | | |
| **Answer 22** | The recommendation for managing fluid in patients with ankle fracture is to minimize perioperative fasting and fluid restriction time and to avoid excessive fluid load during surgery. | For patients with ankle fractures, it is reasonable and beneficial to recommend minimizing perioperative fasting and fluid restriction time and avoiding excessive volume load during surgery. This recommendation is based on the following considerations: 1. **Reducing preoperative fasting and fluid restriction time**:  - Modern anesthesia practice supports shortening preoperative fasting and fluid restriction time, which can improve patient comfort, reduce preoperative anxiety and discomfort.  - A shorter fasting time helps maintain stable blood glucose levels, especially for diabetic patients, which is particularly important.  - Existing guidelines recommend that solid food can be consumed 6 hours before surgery and clear liquids 2 hours before surgery. 2. **Avoiding excessive volume load during surgery**:  - Excessive fluid infusion can lead to tissue edema, increasing the burden on the heart and kidneys, and may even affect wound healing.  - A restrictive fluid management strategy should be adopted, especially in smaller or moderately sized surgeries, such as ankle fracture surgery.  - Appropriate fluid management helps to avoid postoperative complications, such as pulmonary complications, increased cardiac stress, etc. 3. **Individualized assessment**:  - Fluid management strategies should be adjusted according to the individual needs and health status of the patient.  - Fluid management decisions should consider factors such as the patient's age, weight, comorbidities, and preoperative assessment results. Overall, these recommendations align with the best practices of modern anesthesia and perioperative management, aiming to optimize overall patient care, improve postoperative recovery quality, and reduce the risk of complications. In any case, individualized assessment and monitoring of the patient are essential. | For volume management in patients with ankle fractures, the recommendations to shorten perioperative fasting and fluid restriction time and to avoid excessive fluid loading during surgery are reasonable. Firstly, shortening perioperative fasting and fluid restriction time can reduce the patient's hunger and discomfort, improving their comfort level. Prolonged fasting and fluid restriction may lead to excessive physical exhaustion and increase the difficulty of postoperative recovery. Therefore, it is reasonable to recommend minimizing perioperative fasting and fluid restriction time based on the patient's specific conditions and surgical needs. Secondly, avoiding excessive fluid loading during surgery is also very important. Excessive fluid loading may aggravate the cardiac burden, increasing the risk of postoperative cardiovascular complications. Therefore, during the surgical process, it is essential to control the amount of fluid input based on the patient's specific conditions and surgical needs, avoiding excessive fluid loading. However, it is important to note that the recommendations to shorten perioperative fasting and fluid restriction time and to avoid excessive fluid loading during surgery are not suitable for all patients. For patients with special conditions, such as the elderly or those with impaired heart and kidney function, more cautious volume management may be required. Therefore, adjustments should be made based on the patient's specific conditions and the guidance of the doctor during the actual implementation process. |
| **Question 23** | Regarding ankle fracture surgery, intraoperative routine monitoring of body temperature and taking necessary measures to maintain warmth are recommended to prevent intraoperative hypothermia. What is your opinion on this suggestion? | | |
| **Answer 23** | It is recommended to routinely monitor body temperature during surgery and take necessary measures to prevent intraoperative hypothermia. | For ankle fracture surgery, it is very important and reasonable to routinely monitor body temperature during the operation and take necessary measures to maintain warmth to prevent intraoperative hypothermia. The following are several key considerations for this recommendation: 1. **Risk of hypothermia**: Intraoperative hypothermia (body temperature below 36°C) can lead to various complications, including increased risk of infection, delayed postoperative wound healing, increased cardiac events, and postoperative nausea and vomiting. 2. **Importance of temperature monitoring**: Continuous monitoring of intraoperative body temperature helps to identify and correct hypothermia in a timely manner, ensuring patient safety. 3. **Measures to maintain warmth**:  - Use warming blankets or heated air blankets and other warming equipment.  - Maintain the operating room temperature within a suitable range.  - Preheat patients, especially during longer surgeries.  - Warm intravenous fluids and blood products. 4. **Operating room environment**: Operating rooms are typically cooler, and patients have more exposed body areas, making it easy for body temperature to drop during surgery. 5. **Postoperative recovery**: Maintaining normal body temperature helps accelerate postoperative recovery and reduce hospital stay. In summary, active temperature management during surgery is an important part of perioperative care. Taking appropriate measures to maintain warmth can not only improve patient comfort but also reduce the risk of postoperative complications, making it an important consideration in ankle fracture surgery. | Regarding ankle fracture surgery, the recommendation to routinely monitor body temperature during surgery and take necessary measures to maintain warmth to prevent intraoperative hypothermia is reasonable. Hypothermia refers to a situation where the patient's body temperature is below the normal range during surgery. Intraoperative hypothermia can lead to delayed postoperative recovery, increased risk of infection, cardiovascular complications, and other adverse outcomes. Therefore, to avoid the occurrence of intraoperative hypothermia, it is very important to routinely monitor body temperature and take necessary measures to maintain warmth. Routine monitoring of body temperature can be achieved using a thermometer to monitor the patient's temperature changes in real-time. Necessary measures to maintain warmth include using warming blankets, enhancing temperature control in the operating room, etc., to keep the patient's body temperature within the normal range. It is important to note that the occurrence of intraoperative hypothermia may be related to various factors, such as long surgery times, large volume infusions, and anesthetic drugs. Therefore, in addition to routine monitoring of body temperature and taking measures to maintain warmth, it is also necessary to consider the specific circumstances of the patient and take appropriate measures to prevent the occurrence of intraoperative hypothermia. |
| **Question 24** | What is your view on the ERAS concept, which emphasizes more attention to minimally invasive procedures, soft tissue protection, precise reduction during surgery, and the rational use of internal fixation devices while ensuring fixation effectiveness? In the treatment of ankle injuries, the management of posterior malleolus fractures and distal tibiofibular injuries has always been a focus of attention. | | |
| **Answer 24** | The surgical approach for ankle fractures is relatively mature. Under the ERAS concept, more emphasis should be placed on minimally invasive procedures, soft tissue protection, and precise reduction during surgery, and internal fixation should be used reasonably while ensuring the fixation effect. In the treatment of the ankle, the management of posterior malleolus fractures and distal tibiofibular injuries has always been a focus. | The ERAS (Enhanced Recovery After Surgery) concept emphasizes a series of optimized measures throughout the perioperative period to accelerate the postoperative recovery of patients. For ankle fracture surgery, the key points under the ERAS concept are as follows: 1. **Intraoperative minimally invasive procedures and soft tissue protection**: Using minimally invasive surgical techniques and small incisions to minimize damage to surrounding soft tissues helps reduce postoperative pain and swelling and accelerate the recovery process. 2. **Precise reduction**: Ensuring that fracture fragments are correctly aligned is key to achieving good postoperative function and preventing the development of arthritis. 3. **Fixation effectiveness**: Using internal fixation devices rationally while ensuring fixation effectiveness to ensure fracture stability, while reducing the stimulation and impact of internal fixation devices on soft tissues. 4. **Focus on posterior malleolus fractures and distal tibiofibular injuries**: The management of posterior malleolus fractures and distal tibiofibular injuries is crucial for the functional recovery of the ankle joint. The management of these injuries requires a comprehensive consideration of fracture stability, joint alignment, and the overall needs of the patient. 5. **Comprehensive assessment and personalized treatment**: Consider the specific circumstances of the patient (such as age, activity level, comorbidities) to develop a personalized treatment plan. In summary, the ERAS concept encourages the use of more meticulous and precise surgical techniques, as well as more comprehensive patient care strategies, to improve the quality of postoperative recovery for patients, shorten hospital stays, and reduce complications. For ankle fracture surgery, this means adopting minimally invasive surgical techniques, precise reduction, and stable fixation, while also focusing on comprehensive care during and after surgery. | The ERAS (Enhanced Recovery After Surgery) concept emphasizes the reduction of surgical trauma and stress response, and the promotion of rapid patient recovery through the optimization of surgical procedures and postoperative management. In the treatment of ankle joints, the ERAS concept should place greater emphasis on minimally invasive procedures, soft tissue protection, and precise reduction during surgery, and the rational use of internal fixation devices while ensuring fixation effectiveness. Minimally invasive procedures can reduce surgical trauma and bleeding, and shorten postoperative recovery time. In the treatment of ankle fractures, arthroscopic techniques can be used for minimally invasive procedures to reduce damage to surrounding soft tissues. Soft tissue protection is one of the important components of the ERAS concept. During surgery, attention should be paid to protecting the surrounding soft tissues, avoiding excessive traction and compression, and reducing postoperative pain and complications. Precise reduction is key to ensuring fracture healing and functional recovery. In surgery, efforts should be made to achieve precise reduction to avoid malalignment and instability of the fracture ends. Rational use of internal fixation devices can provide stable fixation effects and promote fracture healing. When choosing internal fixation devices, comprehensive consideration should be given to the specific conditions of the patient and the type of fracture to select the appropriate internal fixation device. |
| **Question 25** | Do you think the following suggestions for the fixation of posterior ankle fractures are reasonable and necessary? Consider the size of the posterior ankle fracture fragment, the degree of displacement, and the impact on the stability of the ankle joint comprehensively to decide whether to fix the posterior ankle fracture. The fixation method should preferentially choose screw fixation. | | |
| **Answer 25** | Considering the size, degree of displacement, and impact on the stability of the ankle joint, a decision is made whether to fix the posterior malleolus fracture. The preferred method of fixation is screw fixation. The most prevalent current view is that when the posterior malleolus fracture involves more than 25% of the joint surface on the lateral X-ray and the displacement is greater than 2 mm, open reduction and internal fixation treatment is required for the posterior malleolus fracture. However, the size of the fracture fragment is not the only factor to consider; many physicians believe that the impact of the posterior malleolus fracture on the stability of the ankle joint is more important in deciding whether to fix it. For the reduction and fixation of the posterior malleolus, the posterolateral approach is recommended, which can fix both the lateral malleolus and the posterior malleolus. The posterior malleolus is exposed through the gap between the peroneus muscles and the Achilles tendon, and reduction and fixation are performed under direct vision, paying attention to preserving the integrity of the posterior tibiofibular ligament during reduction. Although there is currently no clear evidence on whether to use screws or plates for fixation of the posterior malleolus, theoretically, plate fixation may increase tendon stimulation and should be used less. For patients with comminuted fractures or osteoporosis where screws alone cannot be used for fixation, plate fixation can be used. | For the fixation recommendation of posterior malleolus fractures, considering the size, displacement degree, and impact on ankle joint stability of the fracture fragment to decide whether to fix is reasonable and necessary. The following is a specific evaluation of this recommendation: 1. **Assessment of Fracture Characteristics**:  - The treatment of posterior malleolus fractures needs to be customized according to the size and displacement degree of the fracture fragment. Small, non-displaced fractures may not require surgical intervention and can be treated with conservative treatment (such as plaster fixation).  - Displaced or larger posterior malleolus fractures usually require surgical treatment for reduction and fixation to ensure the anatomical structure and function of the ankle joint. 2. **Ankle Joint Stability**:  - For fractures that affect ankle joint stability, surgical intervention is necessary to avoid long-term functional impairment and the development of arthritis. 3. **Fixation Method**:  - Screw fixation is a commonly used method for posterior malleolus fractures. It is suitable for most types of posterior malleolus fractures, especially those requiring precise reduction and stability.  - Screw fixation can provide good stability while causing less trauma to the surrounding soft tissues. 4. **Individualized Treatment**:  - The final treatment plan should be based on the patient's specific conditions, such as bone quality, overall health status, and activity level.  - When choosing the fixation method, the specific needs and expected recovery goals of the patient should also be considered. In summary, it is reasonable to decide on the fixation method based on the size, displacement degree, and impact on ankle joint stability of the posterior malleolus fracture fragment. Priority for screw fixation is usually appropriate, but the final treatment decision should be made by the medical team after evaluating all relevant factors. | For the fixation of posterior malleolus fractures, considering the size of the fracture fragment, the degree of displacement, and the impact on the stability of the ankle joint, it is reasonable and necessary to decide whether to fix the posterior malleolus fracture and to preferentially choose screw fixation. Posterior malleolus fracture is a relatively common type of ankle fracture, and the key to its treatment lies in restoring the stability of the ankle joint. Depending on the size of the fracture fragment, the degree of displacement, and the impact on the stability of the ankle joint, it can be decided whether fixation of the posterior malleolus fracture is necessary. If the fracture fragment is small, the displacement is not obvious, and the impact on the stability of the ankle joint is minor, conservative treatment can be chosen; if the fracture fragment is large, the displacement is significant, or the impact on the stability of the ankle joint is significant, fixation treatment is required. The reason for preferring screw fixation is that it has advantages such as minimal trauma, rapid recovery, and good fixation effect. Screw fixation can penetrate through the cortical bone on both sides of the fracture fragment, fixing the fragments together by compression, thereby restoring the stability of the ankle joint. In addition, screw fixation can be adjusted and corrected as needed to achieve better fixation results. In summary, for the fixation of posterior malleolus fractures, considering the size of the fracture fragment, the degree of displacement, and the impact on the stability of the ankle joint, it is reasonable and necessary to decide whether to fix the posterior malleolus fracture and to preferentially choose screw fixation. |
| **Question 26** | What kind of posterior malleolus fragments are considered displaced or large? | | |
| **Answer 26** | The most prevalent current view is that when the posterior malleolus fracture involves more than 25% of the joint surface on the lateral X-ray and the displacement is greater than 2 mm, open reduction and internal fixation treatment is required for the posterior malleolus fracture. | Whether a posterior malleolus fracture is considered displaced or large mainly depends on imaging evaluations (such as X-rays, CT scans) and clinical assessments of the fracture characteristics. The following are some criteria for judging displaced or larger posterior malleolus fractures: 1. **Displacement Degree**:  - Generally, if the fracture fragment has moved 3-5 millimeters or more relative to its original position, this is considered significant displacement.  - Discontinuity of the joint surface is also an important criterion for judging displacement. Clinical relevance is typically considered if the joint surface displacement exceeds 2 millimeters. 2. **Fracture Fragment Size**:  - The proportion of the fracture fragment occupying the joint surface is a key factor in judging its size. For example, larger fracture fragments involving the entire joint surface are considered significant.  - For posterior malleolus fractures, if the fracture fragment includes 25% or more of the joint surface, it is usually considered a large fracture. 3. **Joint Stability**:  - Joint instability caused by the fracture is also an important factor in judging the severity of the fracture. If the fracture causes significant joint instability, then surgical intervention is usually required. 4. **Other Factors**:  - The number and shape of the fracture fragments.  - Whether there is damage to other structures (such as ligaments).  - The patient's overall health status and activity level. When assessing posterior malleolus fractures, doctors will consider these factors comprehensively to determine the severity of the fracture and the appropriate treatment strategy. For displaced or larger posterior malleolus fractures, usually more aggressive treatment measures, such as surgical intervention, are needed to ensure the best functional recovery and reduce the risk of long-term complications. | The degree and size of the posterior malleolus fracture fragment can be assessed through imaging studies such as X-rays or CT scans. Generally, the following conditions may indicate displacement or a larger posterior malleolus fracture fragment: The length of the fracture fragment exceeds 1/4 of the distal tibial articular surface. The width of the fracture fragment exceeds 1/3 of the distal tibial articular surface. The displacement distance of the fracture fragment exceeds 1/4 of the distal tibial articular surface. The rotation angle of the fracture fragment exceeds 15 degrees. It is important to note that the above criteria are only for reference under general circumstances, and specific judgments need to be combined with the patient's specific conditions and imaging examination results. If there is a suspicion of displacement or a larger posterior malleolus fracture fragment, medical attention should be sought promptly and professional medical evaluation and treatment should be received. |
| **Question 27** | What is your view on the following suggestion: during an ankle fracture, unnecessary syndesmotic screw placement should be avoided, emphasizing intraoperative stress testing to verify syndesmotic instability, and if fixation of the syndesmosis is necessary, attention should be paid to good reduction. | | |
| **Answer 27** | During an ankle fracture, unnecessary syndesmotic screw placement should be avoided, emphasizing intraoperative stress testing to verify syndesmotic instability, and if syndesmotic fixation is needed, attention should be paid to good reduction. | Regarding ankle fractures, the advice to avoid unnecessary syndesmotic screw placement and to emphasize the use of intraoperative stress tests to verify syndesmotic instability is reasonable and important. The following is a detailed analysis of these recommendations: 1. **Avoiding unnecessary syndesmotic screw placement**:  - For some ankle fractures, especially those not accompanied by significant syndesmotic instability, unnecessary syndesmotic screw placement may bring additional risks, such as infection, increased surgical trauma, and potential hardware-related complications.  - Consider syndesmotic fixation only when stability is indeed needed. 2. **Intraoperative stress tests to verify syndesmotic instability**:  - Intraoperative stress tests are an effective method for assessing syndesmotic joint stability, which can help surgeons decide whether syndesmotic fixation is necessary.  - Through stress tests, the integrity of the ligaments and the stability of the joint can be visually assessed. 3. **The importance of good reduction**:  - If syndesmotic fixation is determined to be necessary, ensuring good reduction is key. Incorrect reduction may lead to uneven joint lines, increasing the risk of arthritis development.  - Good reduction helps restore the normal anatomical structure and function of the joint. In summary, the treatment recommendations for ankle fractures emphasize the importance of intraoperative decision-making. Surgeons should decide on the most appropriate treatment method based on each patient's specific situation and intraoperative findings. Avoiding unnecessary syndesmotic screw placement and performing good reduction when necessary is a clinical practice aimed at optimizing patient recovery and reducing the risk of complications. | There is some controversy regarding whether to fix the distal tibiofibular joint during ankle fracture and how to do so. Some studies suggest that for patients without significant distal tibiofibular instability, avoiding unnecessary fixation with screws can reduce surgical trauma and the occurrence of complications. Therefore, it is recommended that unnecessary distal tibiofibular screw insertion should be avoided during ankle fracture. However, other studies indicate that for patients with significant distal tibiofibular instability, fixing the distal tibiofibular joint can restore ankle stability and reduce postoperative recurrence and complications. Therefore, it is suggested that intraoperative stress tests should be used to verify distal tibiofibular instability, and if fixation is needed, attention should be paid to good reduction. In summary, whether to fix the distal tibiofibular joint and how to do so should be decided based on the specific circumstances of the patient and the surgical needs. During the operation, factors such as the patient's age, type of fracture, degree of displacement, and ligament injury should be considered comprehensively to develop an individualized treatment plan. At the same time, intraoperative stress tests can be an important basis for determining whether to fix the distal tibiofibular joint. |
| **Question 28** | Do you think that in certain situations, the reduction and fixation of the posterior malleolus can avoid the insertion of distal tibiofibular screws? | | |
| **Answer 28** | Other methods can also be used to avoid fixation of the syndesmosis, such as achieving ankle joint stability by fixing the posterior malleolus. | Yes, in some cases, proper reduction and fixation of the posterior malleolus can indeed avoid the placement of syndesmotic screws. This mainly depends on several factors: 1. **Type and severity of the fracture**: For certain types of ankle fractures, especially those not accompanied by significant syndesmotic joint instability or separation, syndesmotic screw fixation may not be necessary. 2. **Impact of posterior malleolus fracture**: If the posterior malleolus fracture can restore ankle joint stability after proper reduction and fixation, then additional syndesmotic screw fixation may not be needed. 3. **Intraoperative stability assessment**: During surgery, surgeons will assess the stability of the ankle joint. If the ankle joint shows sufficient stability after reduction and fixation of the posterior malleolus, then the use of syndesmotic screws can be avoided. 4. **Individualized treatment decisions**: Each patient's situation is unique, including the specifics of the fracture, overall health status, and expected recovery goals. Therefore, the decision to use syndesmotic screws should be based on individualized assessment. In summary, in appropriate cases, proper reduction and fixation of posterior malleolus fractures can indeed avoid the placement of syndesmotic screws. Such decisions help reduce the complexity of surgery and potential complications, while still ensuring good postoperative recovery and function. However, the final treatment plan should be determined by an experienced surgeon based on each patient's specific situation. | In certain cases, the reduction and fixation of the posterior malleolus may avoid the insertion of syndesmotic screws. For example, for patients with a small posterior malleolus fracture fragment, minimal displacement, and a small impact on ankle joint stability, conservative treatment can be adopted, such as using plaster fixation or external fixators, without the need for syndesmotic screw insertion. Additionally, for patients with significant syndesmotic instability, if the posterior malleolus fracture fragment can be reduced and stabilized to restore ankle joint stability, it may also be possible to avoid the insertion of syndesmotic screws. In such cases, the reduction and fixation of the posterior malleolus fragment can provide sufficient stability to support the normal function of the ankle joint, thereby avoiding the insertion of syndesmotic screws. However, it is important to note that whether syndesmotic screw insertion is necessary also depends on the specific circumstances and surgical needs of the patient. During the surgical process, factors such as the patient's age, fracture type, degree of displacement, and ligament injury should be considered to develop an individualized treatment plan. |
| **Question 29** | For ankle fractures, do you believe that the tourniquet should be released for strict hemostasis before closing the wound and that routine placement of drainage devices is not recommended? | | |
| **Answer 29** | Before closing the wound, release the tourniquet to strictly stop the bleeding, and routine placement of drainage devices is not recommended. | For ankle fracture surgery, it is an important step to loosen the tourniquet for strict hemostasis before closing the wound, and it is also reasonable not to routinely place drainage devices. The following is a specific evaluation of these practices: 1. **Loosening the tourniquet for strict hemostasis**:  - The use of a tourniquet during surgery can reduce intraoperative bleeding and provide a clear surgical field.  - Loosening the tourniquet before closing the wound can reveal and address any potential bleeding points, thereby reducing the risk of postoperative bleeding.  - This step helps ensure that no hematoma or other complications occur during the wound healing process. 2. **Not routinely placing drainage devices**:  - In some cases, placing drainage devices may increase the risk of infection and may not always be necessary.  - Many studies and clinical guidelines suggest that for uncomplicated ankle fracture surgeries, it is not routine to use drainage devices.  - If intraoperative bleeding is well controlled and the wound closure is good, drainage can usually be avoided. 3. **Individualized decision-making**:  - Whether to place a drainage device should be decided based on the type of surgery, the amount of bleeding, the specific circumstances of the patient, and the clinical judgment of the surgeon.  - In some complex or high-risk situations, it may still be necessary to place a drainage device. In summary, loosening the tourniquet for careful hemostasis before the end of surgery is a common and reasonable practice that helps prevent postoperative complications. At the same time, for uncomplicated ankle fracture surgeries, not routinely placing drainage devices can reduce the risk of infection, but the final decision should be based on the specific circumstances of each patient. | For ankle fractures, it is recommended to loosen the tourniquet and strictly stop the bleeding before closing the wound, and it is not advised to routinely place drainage devices. In ankle fracture surgery, using a tourniquet can effectively control bleeding. However, if the tourniquet is not loosened in time for hemostasis, it may lead to an increase in postoperative bleeding volume and increase the risk of postoperative complications. Therefore, it is essential to loosen the tourniquet and strictly stop the bleeding before closing the wound. Additionally, the placement of drainage devices is not a routine procedure for ankle fracture surgery. The main function of drainage devices is to remove blood and exudate from the surgical site, reducing the risk of postoperative hematoma and infection. However, for ankle fracture surgery, due to the small surgical incision and less bleeding, routine placement of drainage devices is not necessary. If the surgical incision is large or the bleeding volume is significant, the use of drainage devices can be considered, but it should be decided based on the specific conditions and surgical needs of the patient. |
| **Question 30** | Do you believe that ankle fracture surgery patients can immediately ingest clear liquids orally once they are awake post-surgery, and if there are no adverse reactions, they can resume a normal diet within 1-2 hours? | | |
| **Answer 30** | Once an ankle fracture surgery patient is awake, they can immediately ingest non-particulate beverages orally, such as clear water, warm water, or light salt water. If there is no adverse reaction, such as nausea or vomiting, they can gradually resume normal diet 1-2 hours later. | Yes, for ankle fracture surgery patients, once they are awake after surgery, they can usually begin to ingest non-particulate beverages. If there are no adverse reactions, they can typically resume normal diet within 1-2 hours. This practice is consistent with the principles of Enhanced Recovery After Surgery (ERAS), and here are several key points: 1. **Early oral intake**:  - Early postoperative oral intake helps promote the recovery of gastrointestinal function and reduce postoperative complications.  - Starting with non-particulate beverages, such as water or juice, can assess the patient's tolerance to oral intake. 2. **Gradual transition to normal diet**:  - If there are no adverse reactions such as nausea or vomiting after ingesting non-particulate beverages, patients can usually gradually resume normal diet within 1-2 hours.  - The type and amount of food should be gradually increased based on the patient's specific conditions and tolerance. 3. **Postoperative recovery assessment**:  - During the process of resuming normal diet, the patient's postoperative recovery should be continuously assessed, including gastrointestinal function, pain control, and overall condition. 4. **Individualized adjustments**:  - Although most patients can resume normal diet early after surgery, adjustments still need to be made based on each patient's individual response and preferences.  - For patients with specific medical conditions, such as diabetes or gastrointestinal diseases, more cautious and personalized dietary arrangements may be required. In summary, for ankle fracture surgery patients, early postoperative oral intake and gradually resuming normal diet in the absence of adverse reactions is a reasonable practice aimed at accelerating recovery, improving patient comfort, and reducing the risk of complications. However, the final dietary plan should consider the individual needs of the patient and the recommendations of the medical team. | For patients undergoing ankle fracture surgery, it is generally recommended to fast and abstain from water for 6 hours after surgery to avoid nausea and vomiting caused by anesthetic drugs. After that, if the patient is awake and has no adverse reactions, they can gradually resume eating. According to conventional clinical practice, patients can ingest clear liquids orally immediately after waking up from ankle fracture surgery, such as plain water, warm water, and diluted salt water. If there are no adverse reactions like nausea or vomiting, they can gradually return to a normal diet 1-2 hours later. It is important to note that the timing and method of resuming eating should be determined based on the patient's specific condition and the doctor's guidance. Some patients may require a longer recovery period or special dietary arrangements, such as elderly patients, pediatric patients, and diabetic patients. Therefore, when resuming eating after surgery, it is important to follow the doctor's advice and closely monitor the patient's condition. |
| **Question 31** | Do you believe that patients with ankle fractures do not need to lie flat on their backs after surgery and can adopt a semi-recumbent position; Encourage patients to get out of bed and engage in necessary activities on the day of surgery or the next day?  For patients with ankle fractures after surgery, it is generally recommended to fast and abstain from drinking for 6 hours after the operation to avoid nausea and vomiting caused by anesthetic drugs. After that, if the patient is awake and has no adverse reactions, they can gradually resume eating.  According to conventional clinical practice, patients with ankle fractures can ingest clear liquids orally immediately after waking up from surgery, such as plain water, warm water, and diluted salt water. If the patient does not experience nausea or vomiting, they can gradually return to a normal diet 1-2 hours later.  It is important to note that the time and method of resuming eating should be determined based on the patient's specific condition and the doctor's guidance. Some patients may require a longer recovery period or special dietary arrangements, such as elderly patients, pediatric patients, diabetic patients, etc. Therefore, when resuming eating after surgery, it is advisable to follow the doctor's advice and closely monitor the patient's condition. | | |
| **Answer 31** | Patients do not need to lie flat without a pillow after surgery and can adopt a semi-recumbent position; encourage patients to get out of bed and perform necessary activities on the day of surgery or the second day. | For patients after ankle fracture surgery, adopting a semi-recumbent position and encouraging early postoperative activity are generally recommended practices. The following is a specific evaluation of these recommendations: | For patients with ankle fractures, it is generally recommended to adopt a semi-reclining position after surgery, rather than sleeping flat without a pillow. This is because sleeping flat without a pillow may increase pressure on the neck and back, leading to discomfort and muscle stiffness. Adopting a semi-reclining position can alleviate these discomforts and is beneficial for the recovery of the respiratory and circulatory systems.   In addition, for activities after ankle fracture surgery, patients are generally encouraged to engage in necessary activities on the day of or the day after surgery. Early activity can promote blood circulation, prevent deep vein thrombosis; it can also promote the recovery of muscle function and reduce the occurrence of postoperative complications. However, the manner and intensity of the activity should be determined based on the patient's specific condition and the guidance of the doctor. Generally, patients can engage in simple activities such as walking, going up and down stairs, etc., but they should avoid strenuous exercise and prolonged weight-bearing. |
| **Question 32** | For postoperative pain management in patients with ankle fractures, it is recommended to use nerve block combined with regular 'background doses' of NSAIDs. If necessary, intravenous patient-controlled analgesia or peripheral nerve block patient-controlled analgesia can be used. Do you think this is reasonable and necessary? | | |
| **Answer 32** | Postoperative pain relief for ankle fracture patients is recommended to use nerve block combined with regular 'background doses' of NSAIDs, and if necessary, use intravenous patient-controlled analgesia pumps or peripheral nerve block patient-controlled analgesia pumps. | For patients with ankle fracture surgery, the use of nerve block combined with regular background doses of nonsteroidal anti-inflammatory drugs (NSAIDs) is an effective and commonly used method for postoperative pain management. If necessary, the use of intravenous patient-controlled analgesia (IV-PCA) or peripheral nerve block patient-controlled analgesia (PNB-PCA) is also reasonable. The following is a detailed analysis of this recommendation: 1. **Nerve Block**:  - Nerve block can effectively control local pain and reduce the need for systemic analgesics.  - For ankle surgery, choosing the appropriate nerve block can greatly improve the patient's postoperative comfort. 2. **Nonsteroidal Anti-inflammatory Drugs (NSAIDs)**:  - NSAIDs can effectively reduce inflammation and pain and are commonly used drugs for postoperative analgesia.  - Regular use of background doses of NSAIDs can provide continuous analgesic effects. 3. **Intravenous Patient-Controlled Analgesia (IV-PCA) or Peripheral Nerve Block Patient-Controlled Analgesia (PNB-PCA)**:  - In cases where pain is difficult to control, IV-PCA or PNB-PCA can be considered.  - These methods allow patients to self-administer analgesic drugs as needed, increasing the flexibility of pain management and patient satisfaction. 4. **Individualized Analgesia Plan**:  - The analgesia plan should be tailored according to the patient's specific condition, pain level, and personal preferences.  - Postoperative pain management should include both pharmacological and non-pharmacological treatments (such as cold therapy, psychological support, etc.). In conclusion, for postoperative pain management in ankle fracture surgery, nerve block combined with regular background doses of NSAIDs is an effective method, and when necessary, IV-PCA or PNB-PCA can be used to further enhance the analgesic effect. This comprehensive analgesic management strategy helps to effectively control postoperative pain and promote the rapid recovery of patients. However, the specific analgesic plan should be customized by the medical team based on the actual needs and responses of the patient. | For postoperative pain relief in patients with ankle fractures, it is recommended to use nerve block combined with regular 'background doses' of NSAIDs, and if necessary, intravenous patient-controlled analgesia or peripheral nerve block patient-controlled analgesia can be used. I believe this is reasonable and necessary. Nerve block is a common method of postoperative pain relief, which can effectively reduce postoperative pain by blocking the conduction of pain signals. Regular 'background doses' of NSAIDs can continuously alleviate pain and have anti-inflammatory effects, which can reduce postoperative inflammatory reactions. Intravenous patient-controlled analgesia and peripheral nerve block patient-controlled analgesia are two common methods of self-controlled analgesia. Intravenous patient-controlled analgesia allows patients to control the infusion rate and dose of the drug themselves, achieving individualized analgesic effects. Peripheral nerve block patient-controlled analgesia is achieved by injecting drugs around the nerve, realizing local analgesic effects. These analgesic methods can effectively reduce the pain of patients and improve the quality of postoperative rehabilitation. However, the specific analgesic plan should be determined based on the specific conditions of the patient and the guidance of the doctor. When using these analgesic methods, attention should be paid to monitoring the patient's pain level and drug side effects, and the treatment plan should be adjusted in a timely manner. |
| **Question 33** | Should all patients undergoing ankle fracture surgery be given prophylactic antiemetic medication 30 minutes before the end of surgery? | | |
| **Answer 33** | All patients undergoing ankle fracture surgery should be given prophylactic antiemetic drugs 30 minutes before the end of surgery. | For patients undergoing ankle fracture surgery, whether to administer prophylactic antiemetic medication 30 minutes before the end of surgery should be decided based on the patient's risk assessment and individual needs. Here are several considerations: 1. **Postoperative Nausea and Vomiting (PONV) Risk Assessment**:  - Postoperative nausea and vomiting are common complications, especially in patients receiving general anesthesia.  - Risk assessment includes considering the patient's personal and surgery-related factors, such as a history of PONV or motion sickness, female gender, non-smokers, and the use of opioids during surgery. 2. **Use of Prophylactic Antiemetic Medication**:  - For high-risk patients, the prophylactic use of antiemetic medication is recommended.  - Low-risk patients may not need routine prophylactic antiemetic medication. 3. **Drug Selection and Timing**:  - The chosen antiemetic medication may include 5-HT3 receptor antagonists (such as ondansetron), corticosteroids (such as dexamethasone), etc.  - Administering medication before the end of surgery can maximize the effect, especially during patient recovery. 4. **Individualized Treatment**:  - The treatment plan should be based on the patient's specific needs, risk factors, and the characteristics of the surgery.  - Before implementing treatment, the doctor will assess the patient's likely response to antiemetic medication and any potential risks. In summary, for patients undergoing ankle fracture surgery, the use of prophylactic antiemetic medication should be based on the patient's PONV risk assessment. For high-risk patients, this is a reasonable approach that can improve patient comfort and reduce postoperative recovery time. However, the final decision should be made by the medical team after a comprehensive assessment. | For patients undergoing ankle fracture surgery, there is no clear guideline for the timing of prophylactic antiemetic medication. Generally, prophylactic antiemetics can be administered 30 minutes before surgery to reduce the incidence of nausea and vomiting caused by anesthetic drugs. However, the specific timing and type of medication should be determined based on the patient's individual condition and the doctor's guidance. Commonly used prophylactic antiemetic medications include 5-HT3 receptor antagonists, dopamine D2 receptor antagonists, and diphenhydramine, among others. These medications can inhibit the occurrence of nausea and vomiting through different mechanisms. It is important to note that prophylactic antiemetic medications cannot completely eliminate the occurrence of nausea and vomiting, but they can significantly reduce the incidence rate. Additionally, prophylactic antiemetic medications have certain side effects and risks, such as dizziness, dry mouth, and constipation. Therefore, when using prophylactic antiemetic medications, they should be used reasonably based on the patient's specific condition and the doctor's guidance. |
| **Question 34** | Patients with stable ankle fracture fixation should begin rehabilitation exercises as soon as possible post-surgery to aid in functional and fracture recovery. What do you think of this suggestion? | | |
| **Answer 34** | Ankle fracture patients with stable fixation should start rehabilitation exercises as soon as possible after surgery, which helps with function and fracture recovery. | For patients with stable ankle fracture fixation, the recommendation to start rehabilitation exercises as soon as possible after surgery is very reasonable and beneficial. Here are several key points of this recommendation: 1. **Promote functional recovery**: Rehabilitation exercises help accelerate the functional recovery of the ankle joint, increase the range of joint motion, strengthen muscle power, and reduce stiffness. 2. **Fracture healing**: Appropriate activity can promote blood circulation, which aids the healing process of the fracture. 3. **Reduce complications**: Early activity helps prevent postoperative complications such as deep vein thrombosis, muscle atrophy, and joint stiffness. 4. **Individualized rehabilitation plan**:  - The rehabilitation plan should be tailored according to the patient's specific condition, the type of surgery, and the stability of the fracture.  - It should be carried out under the guidance of a physical therapist to ensure the safety and effectiveness of the activities. 5. **Gradually increase activity level**:  - Rehabilitation exercises should start with mild intensity and gradually increase in strength and range.  - They should include joint mobility exercises, muscle strengthening exercises, and training for daily living activities. 6. **Monitoring and adjustment**:  - During the rehabilitation process, the patient's response and recovery should be closely monitored, and the exercise plan should be adjusted as needed.  In summary, for patients with stable ankle fracture fixation, starting rehabilitation exercises as soon as possible after surgery helps to accelerate the recovery process and improve the quality of life. However, the rehabilitation plan should be individualized and carried out under the guidance of medical professionals. | For patients with stable ankle fracture fixation, it is very important to start rehabilitation exercises as soon as possible after surgery. Rehabilitation exercises can help patients restore ankle function, promote fracture healing, and reduce the occurrence of postoperative complications. The specific content of rehabilitation exercises should be determined according to the patient's specific condition and the type of surgery. Generally, rehabilitation exercises include muscle strength training, joint mobility training, balance and coordination training, etc. These exercises can be carried out in different ways, such as active movement, passive movement, resistance training, etc. It is important to note that rehabilitation exercises should be carried out under the guidance of a doctor or rehabilitation specialist to ensure safety and effectiveness. When performing rehabilitation exercises, the intensity and frequency of training should be gradually increased according to the patient's specific condition to avoid over-fatigue and injury. In summary, for patients with stable ankle fracture fixation, starting rehabilitation exercises as soon as possible after surgery is very beneficial. Through scientific rehabilitation exercises, patients can recover their functions and fracture healing more quickly. |
| **Question 35** | Should practical discharge criteria be established for patients with ankle fractures, and should patients be followed up regularly for at least 6 months? | | |
| **Answer 35** | Establish feasible discharge criteria and follow up with patients regularly for at least 6 months. | For patients with ankle fracture, establishing practical discharge criteria and conducting at least 6 months of regular follow-up is very important. Here is a detailed analysis of these recommendations: 1. **Establishing discharge criteria**:  - Discharge criteria should ensure that patients leave the hospital under safe and medical conditions.  - Criteria typically include pain control, ability to perform basic daily activities, understanding of postoperative care instructions, and medication management.  - The overall health status of the patient should be assessed, including any potential complications or special needs. 2. **Regular follow-up**:  - Regular follow-up for at least 6 months for patients with ankle fracture can promptly assess and address any issues during the recovery process.  - Follow-up should include assessment of wound healing, pain management, functional recovery, and monitoring for potential complications.  - Follow-up is also an important opportunity to evaluate rehabilitation progress and adjust treatment plans. 3. **Patient education and involvement**:  - Patients and their families should be fully educated to understand the post-discharge care requirements, activity restrictions, and expected recovery process.  - Patient participation in self-care and rehabilitation plans is crucial for promoting recovery. 4. **Ongoing support and resources**:  - Provide necessary resources and support, such as physical therapy, community services, and professional counseling. In summary, for patients with ankle fracture, establishing clear discharge criteria and conducting long-term regular follow-up are key to ensuring safe and effective recovery. These practices help maximize recovery outcomes, reduce the risk of recurrence or long-term complications, and improve overall patient satisfaction. | For patients with ankle fractures, it is very important to establish feasible discharge criteria and conduct regular follow-ups. This can help doctors assess the patient's recovery, identify and manage complications in a timely manner, guide patients in rehabilitation training, and prevent the recurrence of ankle fractures. Establishing feasible discharge criteria requires considering various factors, including the type of fracture, method of fixation, surgical outcome, patient age, and baseline health status. Generally, discharge criteria should include the following: Fracture healing status: Assess the healing status of the fracture through imaging studies such as X-rays or CT scans to ensure that the fracture is stable and has achieved the expected healing effect. Functional recovery status: Evaluate the patient's recovery of ankle function, including joint mobility, muscle strength, and balance. Pain control status: Assess the patient's level of pain and pain management to ensure that pain is effectively alleviated. Patient self-management ability: Evaluate the patient's understanding and self-management of rehabilitation training to ensure that the patient can correctly perform rehabilitation exercises and comply with medical advice. Regular follow-up is also very important for patients with ankle fractures. The follow-up schedule should be determined based on the patient's specific condition, with a general recommendation of at least 6 months of regular follow-up. During follow-up, doctors can assess the patient's recovery, answer patient questions, guide rehabilitation training, and promptly identify and manage complications. In addition, follow-up can help doctors understand the treatment outcomes and preventive measures for the recurrence of ankle fractures. |
